# Supplementary material for: Energy efficiency of ionic transport through proton conducting ceramic electrolytes for energy conversion applications
Source: Royal Society of Chemistry journal article supplement (doi:10.1039/c8ta05373a), 2018-01-01
Supplement: c8ta05373a1.pdf [file c8ta05373a1.pdf]

## **Supplementary information for**

### **Energy efficiency of ionic transport through proton conducting ceramics electrolytes for energy conversion applications**

Takashi Nakamura,<sup>\*a</sup> Shusuke Mizunuma,<sup>a</sup> Yuta Kimura,<sup>a</sup> Yuichi Mikami,<sup>b</sup> Kousuke Yamauchi,<sup>b</sup> Tomohiro Kuroha,<sup>b</sup> Noboru Taniguchi,<sup>b</sup> Yoichiro Tsuji,<sup>b</sup> Yuji Okuyama,<sup>c</sup> Koji Amezawa<sup>a</sup>

<sup>a</sup> Institute of Multidisciplinary Research for Advanced Materials, Tohoku University, 2-1-1, Katahira, Aoba-Ku, Sendai, 980-8577, Japan

<sup>b</sup> Panasonic Corporation, 1006, Oaza Kadoma, Kadoma-shi, Osaka 571-8501, Japan

<sup>c</sup> Faculty of Engineering, University of Miyazaki, 1-1, Gakuenkibanadai-nishi, Miyazaki 889-2192, Japan

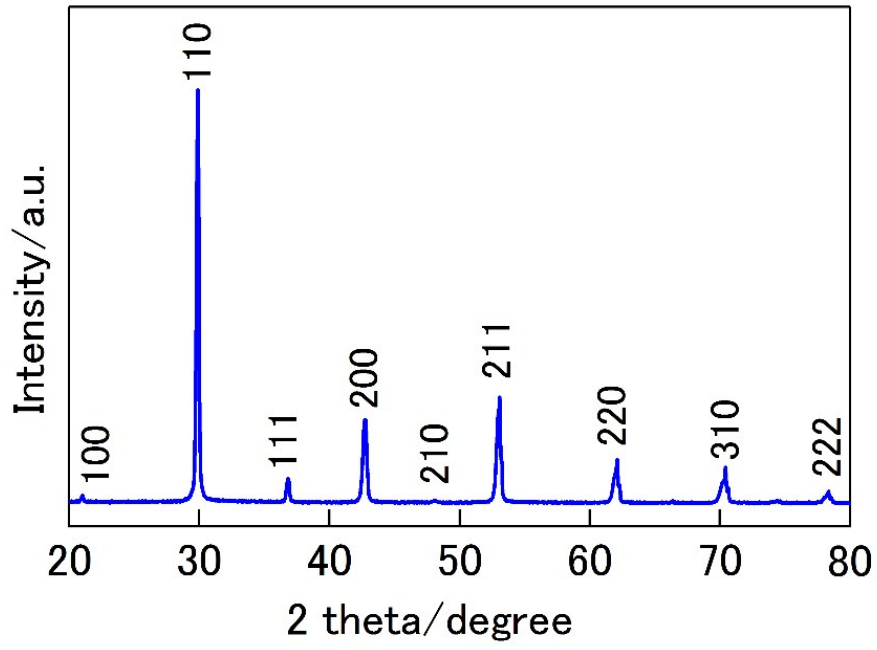

Figure S1. XRD patterns of BaZr<sub>0.8</sub>Y<sub>0.2</sub>O<sub>3-δ</sub>.

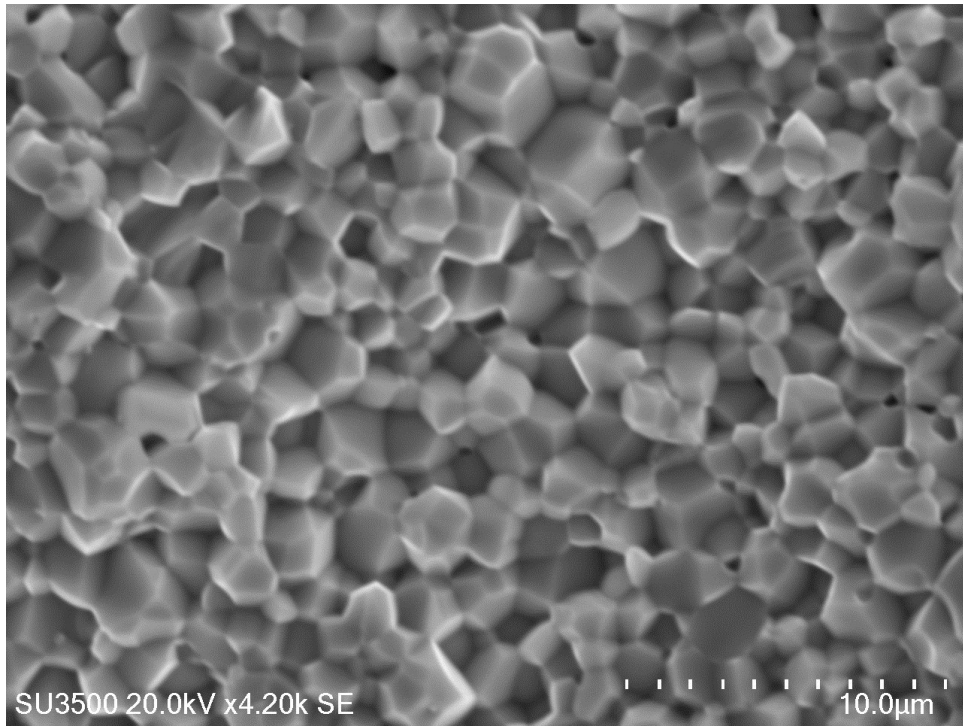

Figure S2. SEM image of the cross section of the dense  $\text{BaZr}_{0.8}\text{Y}_{0.2}\text{O}_{3-\delta}$  specimen.

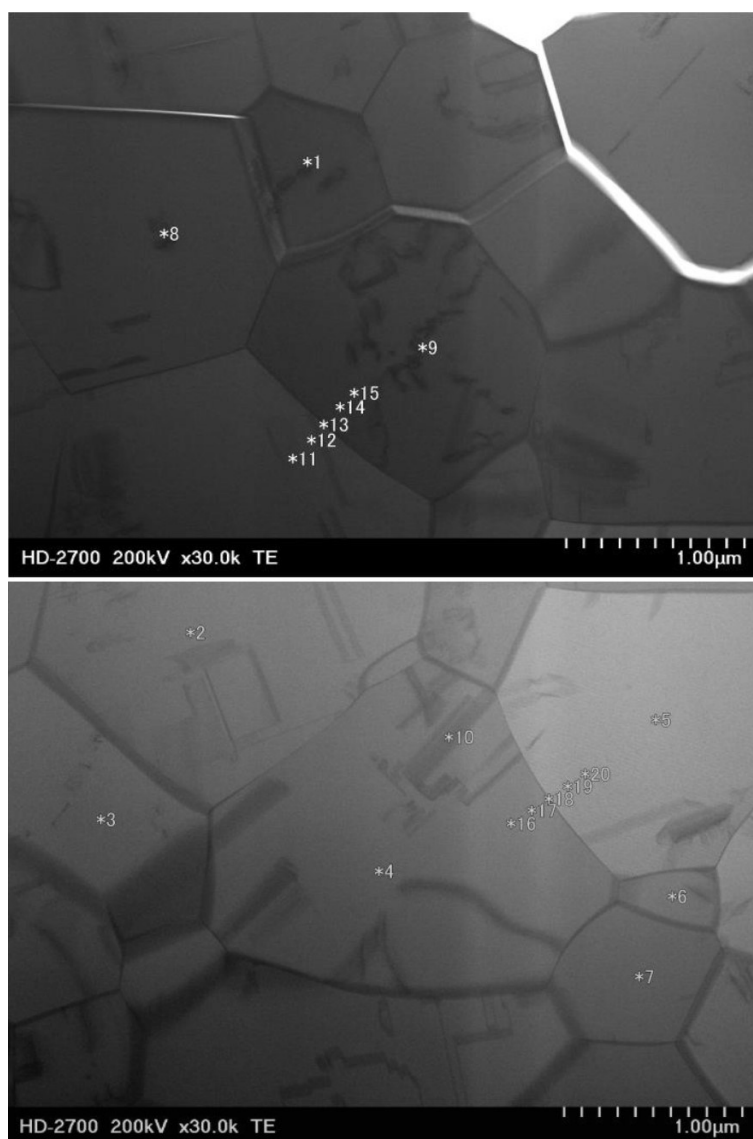

Figure S3. TEM images of the dense  $\text{BaZr}_{0.8}\text{Y}_{0.2}\text{O}_{3-\delta}$  specimen and the points of EDX analysis.

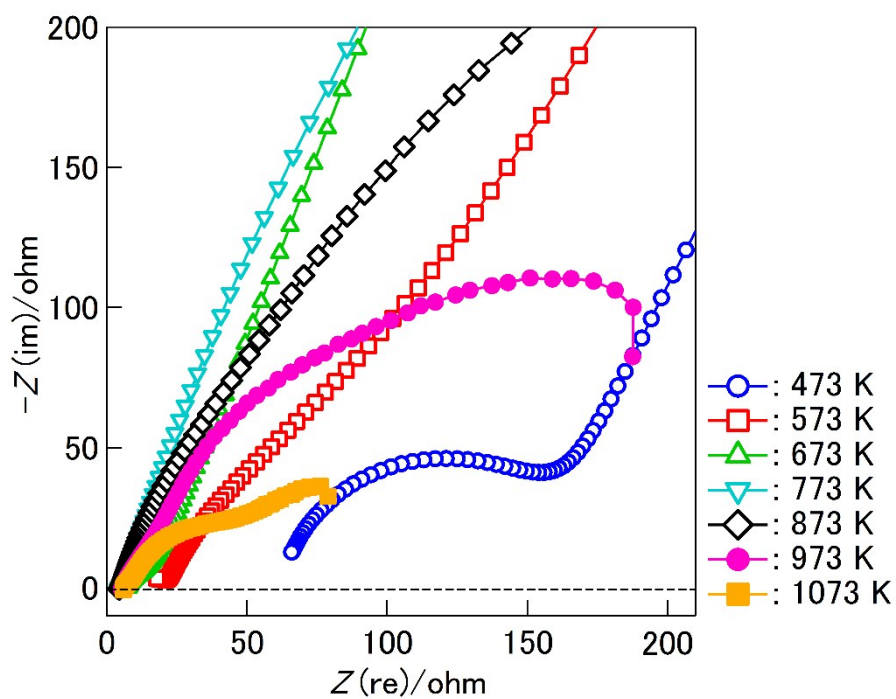

Figure S4. Typical impedance spectra of BaZr<sub>0.8</sub>Y<sub>0.2</sub>O<sub>3-δ</sub> electrolyte measured in 1.9%H<sub>2</sub>O-1%H<sub>2</sub>-Ar at 473 to 1073 K.

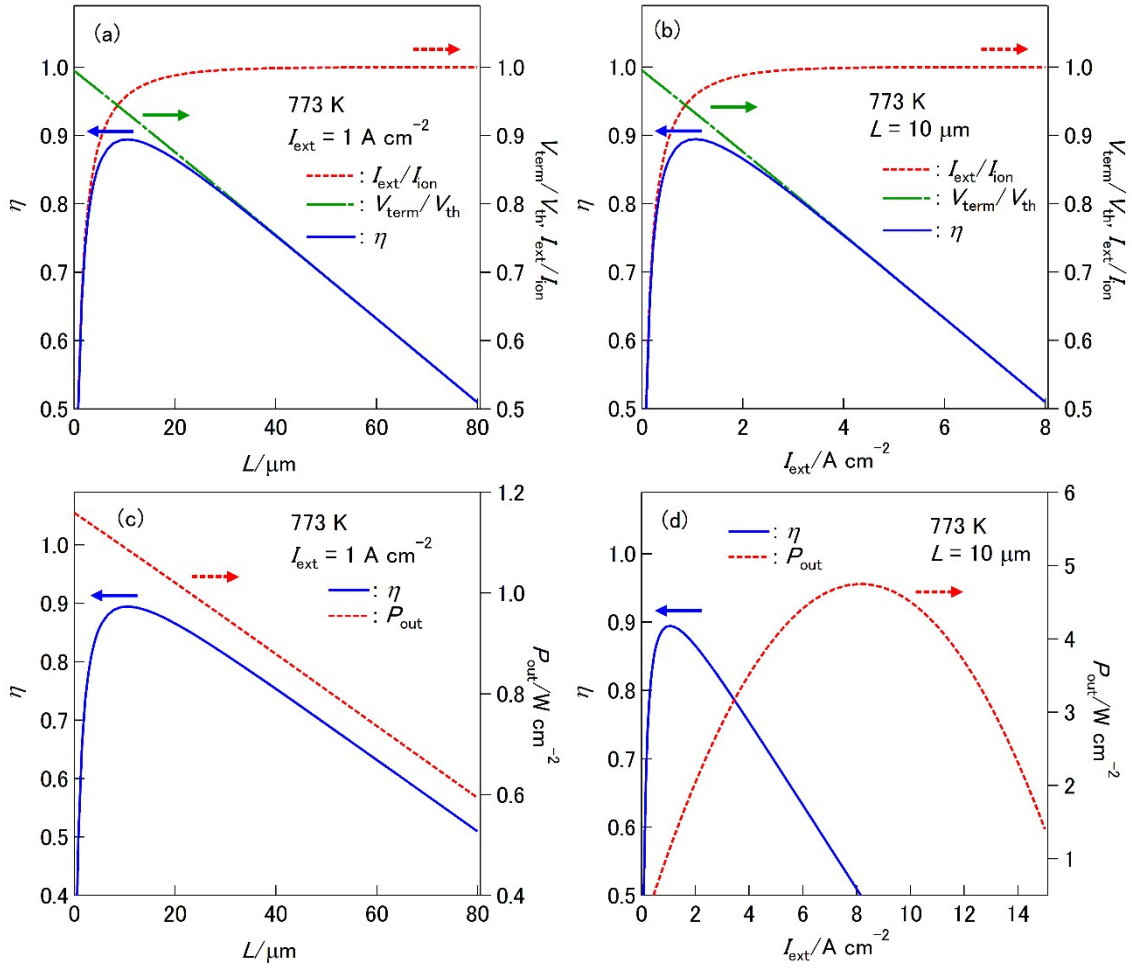

Figure S5. Energy efficiency, current ratio, and voltage ratio of the proton transport through a  $\text{BaZr}_{0.8}\text{Y}_{0.2}\text{O}_{3-\delta}$  electrolyte, (a) the electrolyte thickness dependence and (b) the external current dependence. Energy efficiency and power output of the proton transport through a  $\text{BaZr}_{0.8}\text{Y}_{0.2}\text{O}_{3-\delta}$  electrolyte, (c) the electrolyte thickness dependence and (d) the external current dependence. Anode: 4.2% $\text{H}_2\text{O}$ - $\text{H}_2$ , cathode: 4.2% $\text{H}_2\text{O}$ - $\text{O}_2$ , temperature: 773 K.

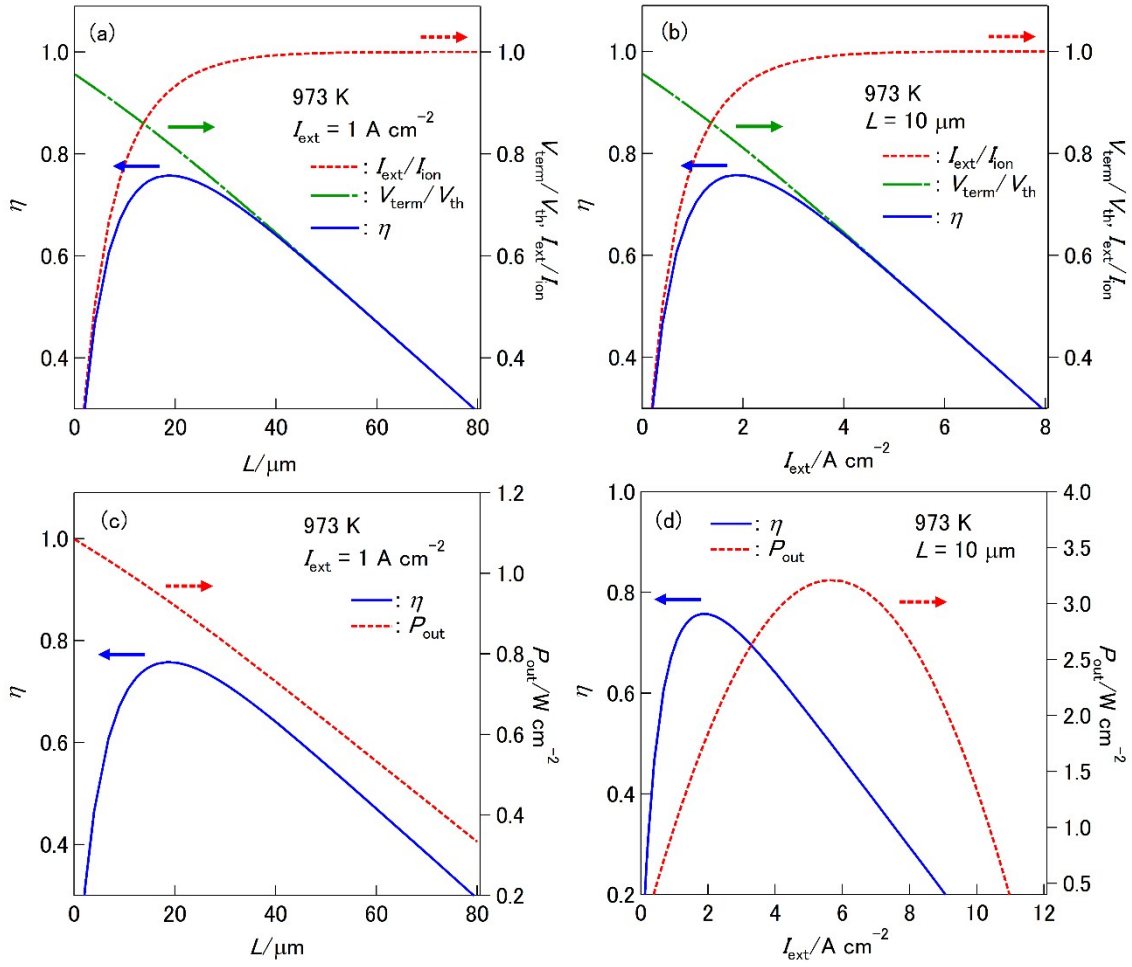

Figure S6. Energy efficiency, current ratio, and voltage ratio of the proton transport through a  $\text{BaZr}_{0.8}\text{Y}_{0.2}\text{O}_{3-\delta}$  electrolyte, (a) the electrolyte thickness dependence and (b) the external current dependence. Energy efficiency and power output of the proton transport through a  $\text{BaZr}_{0.8}\text{Y}_{0.2}\text{O}_{3-\delta}$  electrolyte, (c) the electrolyte thickness dependence and (d) the external current dependence. Anode:  $4.2\% \text{H}_2\text{O} - \text{H}_2$ , cathode:  $4.2\% \text{H}_2\text{O} - \text{O}_2$ , temperature: 973 K.

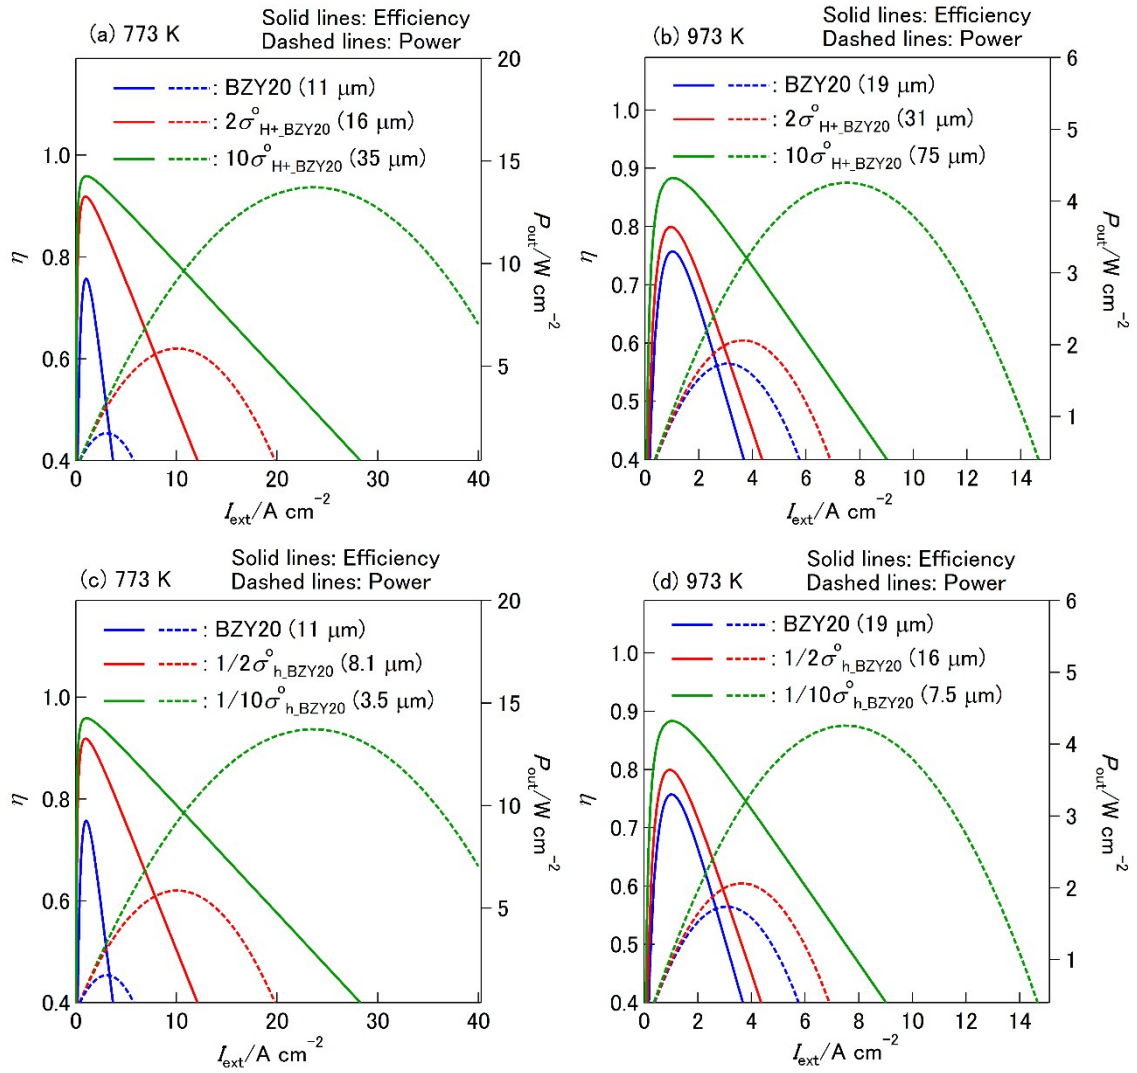

Figure S7. Influence of the partial conductivity variation on the energy efficiencies, the increase of  $\sigma_{H^+}^o$  at (a) 773 K and (b) 973 K, and the decrease of  $\sigma_h^o$  at (c) 773 K and (d) 973 K.
